# Supplementary material for: GPR180 is a component of TGFβ signalling that promotes thermogenic adipocyte function and mediates the metabolic effects of the adipocyte-secreted factor CTHRC1
Source: PubMed Central journal article supplement (PMC8655035; doi:10.1038/s41467-021-27442-x), 2021-12-08
Supplement: 41467_2021_27442_MOESM3_ESM.pdf [file 41467_2021_27442_MOESM3_ESM.pdf]

## **Description of Additional Supplementary Files**

File Name: Supplementary Data 1

Description: The overlap of differentially expressed genes between human brown vs white adipose tissue and brown vs white hMADS cells.

File Name: Supplementary Data 2

Description: Pathway analysis of DEGs obtained by RNA-seq of brown hMADS cells following GPR180 silencing.

File Name: Supplementary Data 3

Description: Proteomic analysis of cell-conditioned media using liquid chromatography coupled to tandem mass spectrometry

File Name: Supplementary Data 4

Description: Genes that are significantly expressed in human mature adipocytes and encode for a secreted protein evidenced by the presence of signal peptide sequence.
